# Supplementary material for: Detection of response shift in health-related quality of life studies: a systematic review
Source: Springer Nature journal article supplement (doi:10.1186/s12955-022-01926-w), 2022-02-05
Supplement: MOESM1 [file 20103546]

| Author                            | Country         | Year | Speciality of the study | Data type | Sample size (initial) | Sample size (end) | Population Type (Specific/Mixed) | Questionnaire                                           | Yes/No (Response Shift) |
|-----------------------------------|-----------------|------|-------------------------|-----------|-----------------------|-------------------|----------------------------------|---------------------------------------------------------|-------------------------|
| Dempster, M. <i>et al.</i>        | Northern Irland | 2010 | Cardiology              | Primary   | 84                    | 57                | Mixed                            | SEIQOL-DW                                               | Yes                     |
| Ito, N. <i>et al.</i>             | Japan           | 2010 | Gastroenteretomy        | Primary   | 20                    | 13                | Mixed                            | SF-36                                                   | Yes                     |
| Kievit, W. <i>et al.</i>          | Netherland      | 2010 | Arthritis               | Primary   | 212                   | 197               | Mixed                            | DAS28 / VAS                                             | Yes                     |
| Kvam, A. <i>et al.</i>            | Norway          | 2010 | Oncology                | Primary   | 260                   | 239               | Mixed                            | EORTC QLQ-C30                                           | Yes                     |
| McPhail, S. & Terry, H.           | Australia       | 2010 | General Medicine        | Primary   | 103                   | 101               | Mixed                            | EQ-5D / VAS                                             | Yes                     |
| Razmjou, H. <i>et al.</i>         | Canada          | 2010 | Orthopedics             | Primary   | 107                   | 107               | Mixed                            | ASES-36                                                 | Yes                     |
| Taminiau-Bloem, E. <i>et al.</i>  | Netherland      | 2010 | Oncology                | Primary   | 92                    | 50                | Mixed                            | EORTC QLQ-C30                                           | Yes                     |
| King-Kallimanis, B. <i>et al.</i> | Netherland      | 2010 | HIV Patients            | Primary   | 403                   | 403               | Mixed                            | HAART                                                   | Yes                     |
| Ahmed, S. <i>et al.</i>           | Canada          | 2011 | Neurology               | Secondary | 1566                  | 1312              | Mixed                            | SF-12                                                   | No                      |
| Hinz, A. <i>et al.</i>            | Germany         | 2011 | Urology                 | Primary   | 427                   | 275               | Male                             | PHQ-2.                                                  | No                      |
| King-Kallimanis, B. <i>et al.</i> | Netherland      | 2011 | Neurology               | Secondary | 2952                  | 1767              | Mixed                            | NARCOMS/SF-12                                           | No                      |
| Li, Y. & Schwartz, CE.            | United States   | 2011 | Neurology               | Secondary | 3839                  | 3008              | Mixed                            | NARCOMS/SF-12                                           | Yes                     |
| Schwartz, CE. <i>et al.</i>       | United States   | 2011 | Neurology               | Secondary | 3008                  | 3008              | Mixed                            | NARCOMS/ SF-12                                          | Yes                     |
| Hon-Yi, Shi. <i>et al.</i>        | Taiwan          | 2011 | Gastrointestinal        | Primary   | 359                   | 353               | Mixed                            | GIQLI                                                   | Yes                     |
| Höfer, S. <i>et al.</i>           | Austria         | 2011 | Cardiology              | Primary   | 64                    | 64                | Mixed                            | SEIQoL-DW y MacNew                                      | Yes                     |
| Lacey, H.P. <i>et al.</i>         | United States   | 2011 | Obesity                 | Primary   | 1865                  | 1865              | Mixed                            | Encuesta por Internet                                   | Yes                     |
| Barclay-Goddard, R. <i>et al.</i> | Canada          | 2011 | Neurology               | Secondary | 677                   | 677               | Mixed                            | SF-36                                                   | Yes                     |
| Galenkamp, H. <i>et al.</i>       | Netherland      | 2012 | Gerontology             | Primary   | 1992                  | 1274              | Mixed                            | SRH-T1 y SRH-T2                                         | Yes                     |
| Kimura, A. <i>et al.</i>          | Japan           | 2012 | Oral Health             | Primary   | 173                   | 138               | Mixed                            | OHRQoL                                                  | Yes                     |
| Neuman, H. <i>et al.</i>          | United States   | 2012 | Oncology                | Primary   | 60                    | 60                | Mixed                            | EORTC -30; EORTC-38 y SQOLS8                            | Yes                     |
| Reissmann, D. <i>et al.</i>       | Germany         | 2012 | Ortodoncy               | Primary   | 126                   | 126               | Mixed                            | OHIP-G y OHIP-G49                                       | Yes                     |
| Zhang, X. <i>et al.</i>           | Singapur        | 2012 | Orthopedics             | Primary   | 74                    | 74                | Mixed                            | SF-36 / EuroQoL                                         | Yes                     |
| Schwartz, CE. <i>et al.</i>       | United States   | 2012 | Inmunology              | Primary   | 521                   | 521               | Mixed                            | QOL Appraisal Profile/Rand-36 /General Health Then Test | No                      |
| Visser, M. <i>et al.</i>          | Netherland      | 2013 | Oncology                | Primary   | 202                   | 202               | Mixed                            | SF-36                                                   | Yes                     |
| Arons, A. <i>et al.</i>           | Netherland      | 2013 | Psychiatry              | Primary   | 220                   | 151               | Mixed                            | VAS                                                     | Yes                     |
| Boucekine, M. <i>et al.</i>       | France          | 2013 | Neurology               | Secondary | 580                   | 524               | Mixed                            | MusiQoL y SF-36                                         | Yes                     |
| Dabakuyo, T.S. <i>et al.</i>      | France          | 2013 | Oncology                | Primary   | 381                   | 381               | Female                           | QLQ-C30, BR23 y EurQOL-EQ-5D                            | Yes                     |
| Fokkema, M. <i>et al.</i>         | Netherland      | 2013 | Psychiatry              | Primary   | 560                   | 250               | Mixed                            | BDI                                                     | Yes                     |

|                                       |               |      |                                                     |           |      |      |        |                             |     |
|---------------------------------------|---------------|------|-----------------------------------------------------|-----------|------|------|--------|-----------------------------|-----|
| Gandhi, P. et al.                     | United States | 2013 | Cardiology                                          | Secondary | 2317 | 909  | Mixed  | SF-36                       | Yes |
| Gandhi, P. et al.                     | United States | 2013 | Cardiology                                          | Secondary | 2317 | 788  | Mixed  | SF-36                       | Yes |
| Lix, L. et al.                        | Canada        | 2013 | Gastrointestinal                                    | Primary   | 388  | 388  | Mixed  | EII (IBDQ) y SF-36          | No  |
| Schwartz, CE. & Sajobi, T.T.          | United States | 2013 | Orthopedics                                         | Primary   | 178  | 169  | Mixed  | SF-36 /ODI                  | Yes |
| Edelaar-Peeters, Y. & Stiggelbout, A. | Netherland    | 2013 | Neurology                                           | Primary   | 44   | 44   | Mixed  | VAS                         | Yes |
| Flynn, T. et al.                      | Australia     | 2013 | Gerontology                                         | Primary   | 478  | 315  | Mixed  | ICECAP-O                    | No  |
| Ahmed, S. et al.                      | Canada        | 2014 | Arthritis, heart failure, diabetes, lung deficiency | Secondary | 776  | 776  | Mixed  | SF-36                       | No  |
| Anotta, A. et al                      | France        | 2014 | Oncology                                            | Secondary | 381  | 381  | Female | EORT QLQ-C30/EORT QLQ-BR23  | Yes |
| Barclay-Goddard, R. & Tate, R.        | Canada        | 2014 | Cardiology                                          | Secondary | 3983 | 745  | Male   | SF-36                       | Yes |
| Brinksman, A. et al                   | Netherland    | 2014 | Oncology                                            | Primary   | 61   | 37   | Mixed  | PedsQL / Cantril ladder     | Yes |
| DeConde, A. et al.                    | United States | 2014 | Otolaryngology                                      | Primary   | 514  | 514  | Mixed  | SNOT-22                     | Yes |
| Hamidou, Z. et al.                    | France        | 2014 | Oncology                                            | Primary   | 381  | 381  | Female | EORTC-QLQ-30 Y BR-23        | Yes |
| Howard, J. et al.                     | United States | 2014 | Orthopedics                                         | Primary   | 56   | 48   | Mixed  | SF-36                       | No  |
| Sajobi, T.T. et al.                   | Canada        | 2014 | Neurology                                           | Primary   | 80   | 80   | Mixed  | QOLIE-31                    | Yes |
| Schwartz, C.E. et al.                 | United States | 2014 | Neurology                                           | Secondary | 859  | 859  | Mixed  | NARCOMS/SF-12               | Yes |
| Elliot, B. et al.                     | United States | 2014 | Nefrology                                           | Primary   | 31   | 27   | Mixed  | Qualitative Study           | Yes |
| Blanckenburg, P. et al.               | Germany       | 2014 | Oncology                                            | Primary   | 480  | 86   | Mixed  | WHOQOL-BREF                 | Yes |
| Boucekine, M. et al.                  | France        | 2014 | Psychiatry                                          | Primary   | 124  | 124  | Mixed  | SF-36                       | Yes |
| Guilleux, A. et al.                   | France        | 2015 | Different diagnosis                                 | Secondary | 669  | 537  | Mixed  | SF-36                       | Yes |
| Liu, J. & Davis, G.                   | United States | 2015 | Otolaryngology                                      | Primary   | 79   | 32   | Mixed  | SNOT-20                     | Yes |
| Mayo, N. et al.                       | Canada        | 2015 | Internal Medicine                                   | Secondary | 388  | 388  | Mixed  | SF-36                       | No  |
| Mollerup A. & Johansen, J.            | Denmark       | 2015 | Dermatology                                         | Primary   | 306  | 306  | Mixed  | VASnow / VASworst           | No  |
| Rutgers, M. et al.                    | Netherland    | 2015 | Orthopedics                                         | Primary   | 74   | 20   | Mixed  | VAS                         | Yes |
| Sajobi, T.T. et al.                   | Canada        | 2015 | Neurology                                           | Secondary | 409  | 409  | Mixed  | SF-36                       | Yes |
| Traa, M. et al.                       | Netherland    | 2015 | Oncology                                            | Primary   | 672  | 205  | Mixed  | WHOQOL-Bref                 | No  |
| Verdam, M. et al.                     | Netherland    | 2015 | Oncology                                            | Primary   | 1157 | 1157 | Mixed  | EQ-5D/ EORTC-QLQ-C30 / RSCL | Yes |
| Phillips, R. et al.                   | Singapur      | 2015 | Oncology                                            | Primary   | 167  | 167  | Mixed  | EORTC QLQ-C30               | No  |
| Schwartz, C.E. et al.                 | Canada        | 2015 | chronic illness                                     | Primary   | 172  | 172  | Mixed  | SF-36y VAS                  | No  |

|                                  |                |      |                   |           |      |      |        |                              |                 |
|----------------------------------|----------------|------|-------------------|-----------|------|------|--------|------------------------------|-----------------|
| Blanchin, M. <i>et al.</i>       | France         | 2016 | chronic illness   | Primary   | 669  | 499  | Mixed  | SF-36                        | Yes             |
| Gandhi, P. <i>et al.</i>         | United States  | 2016 | Otolaryngology    | Primary   | 238  | 238  | Mixed  | PAQLQ                        | No              |
| Gerlich, G. <i>et al.</i>        | Germany        | 2016 | Oncology          | Primary   | 522  | 402  | Male   | EORTC QLQ-C30                | Yes             |
| Hollman, F. <i>et al.</i>        | Netherland     | 2016 | Orthopedics       | Primary   | 36   | 36   | Mixed  | WORC /EuroQol -5D-3L         | No              |
| Lix, L. <i>et al.</i>            | Canada         | 2016 | Internal Medicine | Primary   | 606  | 388  | Mixed  | SF-36                        | Yes             |
| Nolte, S. <i>et al.</i>          | Germany        | 2016 | Psychiatry        | Secondary | 1188 | 1188 | Mixed  | ICD-10                       | Yes             |
| Ousmen, A. <i>et al.</i>         | France         | 2016 | Oncology          | Secondary | 381  | 381  | Female | EORTC-QLQ-C30/EORTC-QLQ-BR23 | Yes             |
| Reissmann, D. <i>et al.</i>      | Germany        | 2016 | Oral Health       | Secondary | 554  | 554  | Mixed  | OHIP                         | No              |
| Sebille, V. <i>et al.</i>        | France         | 2016 | Internal Medicine | Primary   | 390  | 390  | Mixed  | PreKit-QOL                   | No              |
| Taminiau-Bloem, E. <i>et al.</i> | Netherland     | 2016 | Oncology          | Primary   | 50   | 24   | Mixed  | EORTC QLQ-C30                | No              |
| Verdam, M. <i>et al.</i>         | Netherland     | 2016 | Oncology          | Secondary | 485  | 437  | Mixed  | SF-36                        | Yes             |
| Wu, P.                           | Taiwan         | 2016 | Psychology        | Primary   | 320  | 320  | Mixed  | BDII                         | Yes             |
| Arthur, J. <i>et al.</i>         | United Kingdom | 2016 | Audiology         | Primary   | 16   | 16   | Mixed  | GHABP                        | Yes             |
| Jakola, A. <i>et al.</i>         | Sweden         | 2017 | Neurology         | Primary   | 210  | 73   | Mixed  | EQ-5D-3L                     | No              |
| Chen, P. <i>et al.</i>           | United States  | 2017 | Mental health     | Primary   | 114  | 114  | Mixed  | ISI and PSQI                 | No              |
| Hosseini, K. <i>et al.</i>       | France         | 2017 | Internal Medicine | Primary   | 264  | 171  | Mixed  | EQ-5D-3L y SF-6D             | No              |
| Jabayilov, R. <i>et al.</i>      | Netherland     | 2017 | Psychiatry        | Secondary | 540  | 450  | Mixed  | OQ-45                        | No              |
| Machuca, C. <i>et al.</i>        | Germany        | 2017 | Oral Health       | Primary   | 75   | 75   | Mixed  | DHEQ /CRT                    | Yes             |
| Powell, G. <i>et al.</i>         | Canada         | 2017 | Mental health     | Secondary | 2148 | 2148 | Mixed  | QOLI-20                      | No              |
| Sajobi, T.T. <i>et al.</i>       | Canada         | 2017 | Pediatrics        | Primary   | 373  | 373  | Mixed  | QOLCE-55                     | Yes             |
| Salmon, M. <i>et al.</i>         | France         | 2017 | Oncology          | Secondary | 466  | 466  | Female | MFI-20 / QLC-C30             | Yes             |
| Schwartz, C. E. <i>et al.</i>    | United States  | 2017 | Neurology         | Secondary | 858  | 858  | Mixed  | Rand-12                      | Yes             |
| Hinz, A. <i>et al.</i>           | Alemania       | 2017 | Oncology          | Secondary | 2059 | 2059 | Mixed  | EORTC QLC-C30                | Do not indicate |
| Spulling, S. <i>et al.</i>       | Germany        | 2017 | Gerontology       | Primary   | 3854 | 1764 | Mixed  | SRH-T1 y SRH-T2              | Yes             |
| Tessier, P. <i>et al.</i>        | France         | 2017 | Oncology          | Secondary | 215  | 215  | Female | SWLS y EORTC QLQ-C30         | Yes             |
| Verdam, M. <i>et al.</i>         | Netherland     | 2017 | Oncology          | Primary   | 170  | 170  | Mixed  | SF-36                        | Yes             |
| Yang, Y. <i>et al.</i>           | United States  | 2017 | Neurology         | Primary   | 124  | 124  | Mixed  | EQ-5D/UPDRS                  | No              |
| Hosseini, B. <i>et al.</i>       | Iran           | 2017 | Oncology          | Primary   | 211  | 211  | Mixed  | EORTC QLQ-C30                | Yes             |

|                                |                |      |                  |                 |      |      |        |                       |     |
|--------------------------------|----------------|------|------------------|-----------------|------|------|--------|-----------------------|-----|
| Aburub, A. <i>et al.</i>       | Canada         | 2018 | Oncology         | Primary         | 192  | 97   | Mixed  | EQ-5D                 | Yes |
| Friedrich, M. <i>et al.</i>    | Germany        | 2018 | Oncology         | Primary         | 350  | 308  | Female | EORTC QLQ-C30         | Yes |
| Krägeloh, C. <i>et al.</i>     | New Zealand    | 2018 | Psychology       | Primary         | 181  | 181  | Mixed  | CHIME                 | Yes |
| Nichols, G. <i>et al.</i>      | New Zealand    | 2018 | Ortodoncy        | Primary         | 57   | 57   | Mixed  | OHIP-14               | Yes |
| Reissmann, D. <i>et al.</i>    | Germany        | 2018 | Oral Health      | Primary         | 126  | 126  | Mixed  | OHIP -49              | Yes |
| Murray, A. <i>et al.</i>       | United Kingdom | 2018 | Psychology       | No especificado | 359  | 359  | Mixed  | CORE-OM               | Yes |
| Schmidt, H., <i>et al.</i>     | Germany        | 2018 | Oncology         | Secondary       | 518  | 518  | Mixed  | EORTC QLC-30          | No  |
| Schwartz, C.E. <i>et al.</i>   | United States  | 2018 | Neurology        | Secondary       | 2104 | 2104 | Mixed  | SF-36                 | Yes |
| Wang, X. <i>et al.</i>         | China          | 2018 | Gerontology      | Primary         | 238  | 238  | Mixed  | SF-12                 | Yes |
| Carlier, I. <i>et al.</i>      | Netherland     | 2019 | Psychiatry       | Primary         | 206  | 206  | Mixed  | SQ-48                 | Yes |
| Felix, J. <i>et al.</i>        | Germany        | 2019 | Orthopedics      | Primary         | 203  | 137  | Mixed  | EQ-5D-3L              | Yes |
| Friedrich, M. <i>et al.</i>    | Germany        | 2019 | Cardiology       | Primary         | 479  | 282  | Mixed  | EORTC-QLQ-C30         | Yes |
| Powden, C. <i>et al.</i>       | United States  | 2019 | Orthopedics      | Primary         | 20   | 20   | Mixed  | FAAM-Sport            | No  |
| PreilB, M. <i>et al.</i>       | Germany        | 2019 | Oncology         | Primary         | 197  | 197  | Male   | EORTC QLQ-C30 y PHQ-4 | Yes |
| Rohn, E. <i>et al.</i>         | United States  | 2019 | Neurology        | Primary         | 40   | 40   | Mixed  | SCI-QOL               | Si  |
| Haagsma, J. <i>et al.</i>      | Netherland     | 2020 | Traumalogy       | Primary         | 550  | 550  | Mixed  | EQ-5D-3L y EQ-VAS     | Yes |
| Machuca, C. <i>et al.</i>      | United Kingdom | 2020 | Ortodoncy        | Primary         | 145  | 145  | Mixed  | OHIP-Edent            | Yes |
| Schwartz, C.E. <i>et al.</i>   | United States  | 2020 | General Medicine | Secondary       | 1481 | 1481 | Mixed  | PROMIS-10             | No  |
| ten Ham, R. <i>et al.</i>      | United States  | 2020 | Oncology         | Primary         | 3161 | 1677 | Male   | SF-36 y UCLA (PCI)    | Yes |
| Tew, M. <i>et al.</i>          | Australia      | 2020 | Orthopedics      | Secondary       | 1892 | 1553 | Mixed  | SF-12                 | No  |
| Topp, J. <i>et al.</i>         | United States  | 2020 | Neurology        | Primary         | 100  | 93   | Mixed  | SF-12                 | No  |
| Artavia-Mora, L. <i>et al.</i> | Netherland     | 2020 | Virology         | Secondary       | 3625 | 3625 | Mixed  | CD4                   | No  |
| Murata, T. <i>et al.</i>       | Japan          | 2020 | Oncology         | Secondary       | 368  | 368  | Female | EORTC QLQ-C30         | Yes |
